# Supplementary material for: MANET: tracing evolution of protein architecture in metabolic networks
Source: PubMed Central journal article supplement (PMC1559654; doi:10.1186/1471-2105-7-351), 2006-07-19
Supplement: 1471-2105-7-351-S1.pdf [file 1471-2105-7-351-S1.pdf]

## SUPPLEMENTARY DATA

### MANET: tracing evolution of protein architecture in metabolic networks

Hee Shin Kim<sup>1</sup>, Jay E. Mittenthal<sup>2</sup>, Gustavo Caetano-Anollés<sup>1§</sup>

<sup>1</sup>Department of Crop Sciences, and <sup>2</sup>Department of Cell and Developmental Biology, University of Illinois, Urbana, IL 61801, USA

§Corresponding author

#### Join operations

We combined information from two or more entities in MANET with the join operation, extending information about the individual entities being considered. For example, we joined “PDBclassification” and “MetabolicNetwork-A” together using properties common to both entities (Fig. S1A) and obtained a record set for the new entity “MetabolicNetworkWithPDB”, which describes protein fold(s) in enzymes of subnetworks. Similarly, we joined the “MetabolicNetworkWithPDB” and the “Ancestry” entities together using structural PDB entries (Fig. S1B), obtaining a record set for “MetabolicAncestryNetwork” that included the mapping of protein folds and ancestries to enzymes in subnetworks (Fig. S1C). The join operation linked 687 enzymes to protein folds. This represents about 35% of total enzymes associated with pathway information in the KEGG database.

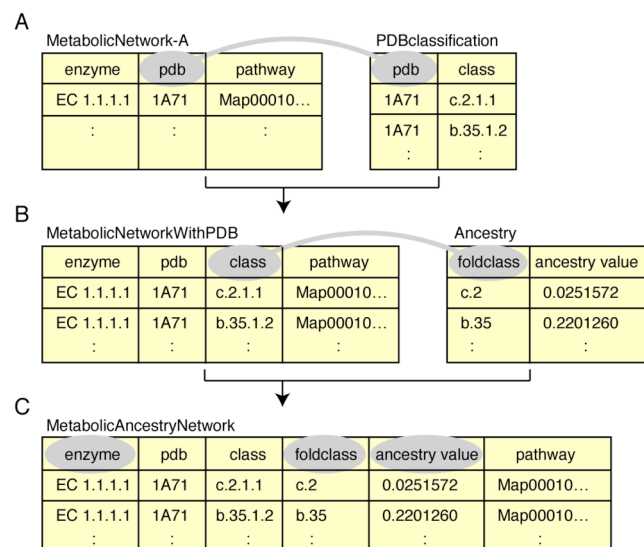

**Fig. S1. Join operations in metabolic MANET.** The pdb is a common field that links enzymes in “MetabolicNetwork-A” to SCOP assignments in “PDBclassification” (A), creating the record set for the entity “MetabolicNetworkWithPDB” (B). Classification of fold architectures can then join “MetabolicNetworkWithPDB” with “AncestryValue” (B), creating “MetabolicAncestryNetwork” (C), a file that combines enzyme, fold class, and ancestry value together.

#### Superfamily prediction using HMMs

In order to increase protein fold assignments to enzymes in metabolic pathways, we used a library of HMMs for remote homology detection in SUPERFAMILY. We used the model library, Perl wrapper scripts for sequence alignment, and the Sequence Alignment and Modeling System (SAM) (<http://www.cse.ucsc.edu/research/compbio/sam.html>), and ran the SUPERFAMILY software package locally in a 15-node dual-processor Xserve cluster using the genes catalog file obtained from KEGG (<ftp://ftp.genome.ad.jp/pub/kegg/tarfiles/genes.tar.gz>). This file includes amino acid and nucleotide sequence information from complete or partial

genome sequences. As shown in Figure S2A, we constructed a database with the amino acid sequences from KEGG, and used Perl scripts to select sequences associated with the enzymes that had gene assignments but lacked structural PDB information. A total of 20,948 amino acid sequences were selected. We applied the same procedure to enzymes that had gene and structural PDB information but failed to join with the structural SCOP classification. In this case, 5,337 additional amino acid sequences were selected. We distributed sequences into individual compute nodes running the HMM package with a threshold *E* value of 0.02 and retrieved superfamily IDs that were associated with targeted enzymes. We also retrieved structural classifications corresponding to the superfamily IDs using the SCOP database file, and inserted them into the entity “MetabolicNetwork-B” of the metabolic ancestry network. Joining the “MetabolicNetwork-B” and “Ancestry” entities together resulted in an additional record set defining the entity “MetabolicAncestryNetwork”. These operations increased the number of enzymes linked to protein folds.

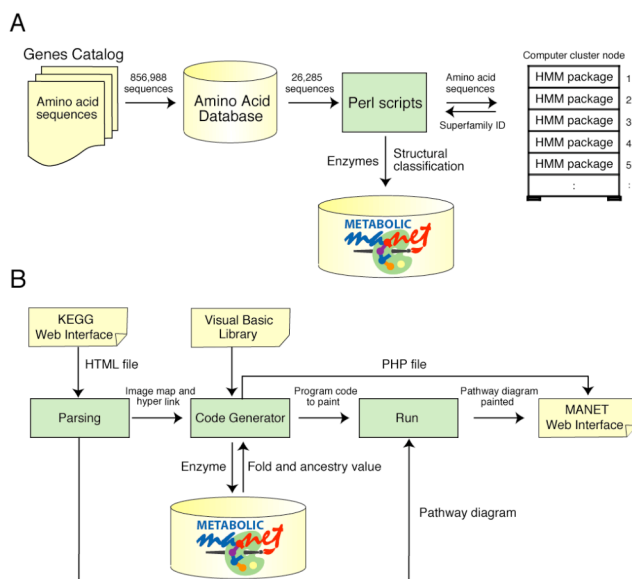

**Fig. S2. HMM-based structural prediction and enzyme coloring schemes.** A. Perl scripts retrieved 26,285 amino acid sequences related to enzymes identified by the join operation. HMMs were then used to assign superfamily IDs to sequences using a computer cluster. Enzymes with fold superfamily assignments were finally inserted into “MetabolicNetwork-B” in metabolic MANET. B. The Code Generator outputs PHP files that run on the MANET web server and Visual Basic script files that paint with color those nodes that have enzyme entries in subnetwork diagrams.

#### Coloring

Coloring is a feature that describes graphically the relative age of a metabolic enzyme in the network. The enzymes in MANET are linked to protein fold(s) to which individual ancestries can be assigned and painted on sub-network diagrams. To accomplish this, we divided the range of ancestries into 12 classes, giving them individual hues in a color scale. We also developed a ‘code generator’ that created programming codes that paint the colors corresponding to fold ancestry values on pathway diagrams and PHP files that were used for the web interface of MANET. The code generator was run with the HTML source files and pathway diagrams of the KEGG web interface. Figure S2B describes the computerized procedure for coloring. We first downloaded the KEGG web interface including HTML source files and pathway diagrams. We ran the code generator with the HTML source files. The code generator parsed image maps and hyper links from the files, and created the PHP files and programming codes based on a

Visual Basic library. We then ran the programming code with the pathway diagrams on a Windows operating system. As a result, we obtained new pathway diagrams painted with ancestry values.

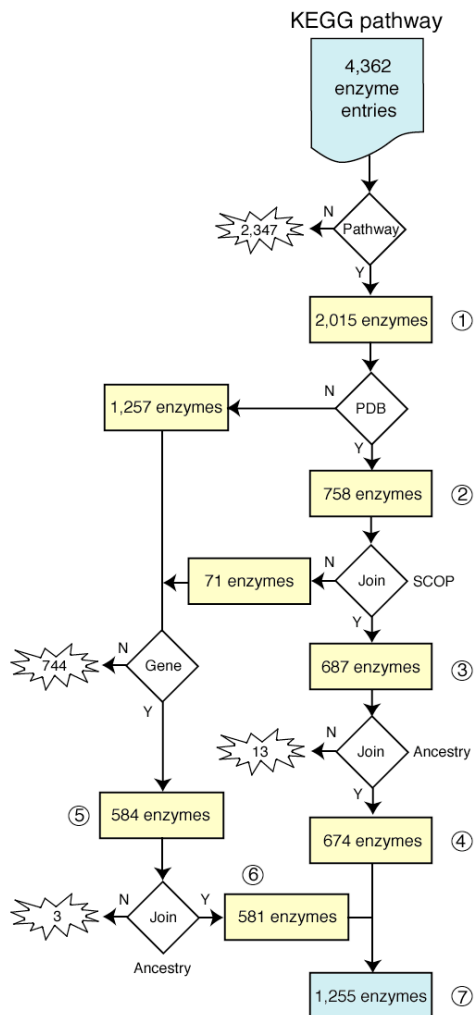

**Fig. S3. Analysis and sorting of metabolic MANET data.** A total of 4,362 enzyme entries were retrieved from KEGG, 2,015 of which had subnetwork information (①). Among these, 758 enzymes had structural PDB entries associated with SCOP (②), 687 of which could be successfully linked to protein folds (③) and 674 of which could be painted with ancestry values (④). The remaining 1,257 enzymes with no associated PDB entries and the 71 enzymes that could not be assigned to folds were further analyzed. A total of 584 enzymes were linked to protein folds using HMM superfamily prediction (⑤), 581 of which were painted with ancestry values (⑥). Overall, 1,255 enzymes were linked to protein folds and were colored in metabolic MANET (⑦).

#### Analysis and sorting of data in metabolic MANET

Figure S3 describes individual steps in the analysis and sorting of data. A total of 4,363 enzyme entries belonging to 137 metabolic pathways were registered in the KEGG pathway database file downloaded on December 2004. Out of these, 2,015 enzymes had subnetwork information. We assumed that these enzymes represent adequately the 132 metabolic subnetworks described in KEGG. Among these, 758 had structural PDB entries associated with them that could be used to assign SCOP folds architectures to metabolic nodes. We used a join operation to link 687 enzymes success-

fully to protein folds and 674 of them to ancestry values. The remaining 1,257 enzymes with no associated PDB entries and the 71 enzymes that could not be assigned to folds were subjected to HMM fold superfamily prediction (see Fig. S2A). As a result, 584 enzymes could be linked to folds, 581 of which were assigned ancestry values. A total of 1,255 enzymes were finally linked to protein folds and were painted in subnetworks. This represents 63% of all nodes in the metabolic network.

#### Contact information

THE MANET PROJECT, Atelier of Plant Bioinformatics, Department of Crop Sciences, University of Illinois, 1101 W Peabody Drive, Urbana, IL 61801, USA. Fax: 217-333-8046. E-mail: evolutionary-manet@uiuc.edu.

**Table 1. Painting efficiency in metabolic MANET**

| KEGG pathway                                         | N <sub>KEGG</sub> | N <sub>MANET</sub> | %     |
|------------------------------------------------------|-------------------|--------------------|-------|
| map00010 Glycolysis-gluconeogenesis                  | 38                | 35                 | 92.10 |
| map00020 Citrate cycle (TCA cycle)                   | 23                | 20                 | 86.96 |
| map00030 Pentose phosphate pathway                   | 33                | 26                 | 78.79 |
| map00031 Inositol metabolism                         | 5                 | 5                  | 100   |
| map00040 Pentose-glucuronate interconversions        | 50                | 32                 | 64    |
| map00051 Fructose and mannose metabolism             | 58                | 37                 | 63.79 |
| map00052 Galactose metabolism                        | 36                | 28                 | 77.78 |
| map00053 Ascorbate and aldarate metabolism           | 25                | 13                 | 52    |
| map00061 Fatty acid biosynthesis (path 1)            | 14                | 13                 | 92.86 |
| map00062 Fatty acid biosynthesis (path 2)            | 7                 | 5                  | 71.43 |
| map00071 Fatty acid metabolism                       | 28                | 20                 | 71.43 |
| map00072 Synthesis-degradation of ketone bodies      | 6                 | 5                  | 83.33 |
| map00100 Biosynthesis of steroids                    | 31                | 26                 | 83.87 |
| map00120 Bile acid biosynthesis                      | 23                | 14                 | 60.87 |
| map00130 Ubiquinone biosynthesis                     | 7                 | 6                  | 85.71 |
| map00140 C21-Steroid hormone metabolism              | 16                | 11                 | 68.75 |
| map00150 Androgen and estrogen metabolism            | 23                | 14                 | 60.87 |
| map00190 Oxidative phosphorylation                   | 11                | 9                  | 81.82 |
| map00193 ATP synthesis                               | 1                 | 1                  | 100   |
| map00195 Photosynthesis                              | 3                 | 3                  | 100   |
| map00220 Urea cycle-metabolism of amino groups       | 34                | 32                 | 94.12 |
| map00230 Purine metabolism                           | 96                | 79                 | 82.29 |
| map00240 Pyrimidine metabolism                       | 61                | 48                 | 78.69 |
| map00251 Glutamate metabolism                        | 35                | 32                 | 91.43 |
| map00252 Alanine and aspartate metabolism            | 38                | 30                 | 78.95 |
| map00253 Tetracycline biosynthesis                   | 3                 | 1                  | 33.33 |
| map00260 Gly, Ser and Thr metabolism                 | 55                | 47                 | 85.45 |
| map00271 Methionine metabolism                       | 23                | 20                 | 86.96 |
| map00272 Cysteine metabolism                         | 21                | 14                 | 66.67 |
| map00280 Val, Leu and Ileu degradation               | 31                | 24                 | 77.42 |
| map00290 Val, Leu and Ileu biosynthesis              | 15                | 13                 | 86.67 |
| map00300 Lysine biosynthesis                         | 29                | 23                 | 79.31 |
| map00310 Lysine degradation                          | 45                | 24                 | 53.33 |
| map00311 Penicillins-cephalosporins biosynthesis     | 8                 | 6                  | 75    |
| map00330 Arginine and proline metabolism             | 67                | 46                 | 68.66 |
| map00340 Histidine metabolism                        | 34                | 26                 | 76.47 |
| map00350 Tyrosine metabolism                         | 62                | 37                 | 59.68 |
| map00360 Phenylalanine metabolism                    | 38                | 24                 | 63.16 |
| map00361 $\gamma$ -Hexachlorocyclohexane degradation | 9                 | 8                  | 88.89 |
| map00362 Benzoate degradation via hydroxylation      | 37                | 23                 | 62.16 |
| map00380 Tryptophan metabolism                       | 52                | 33                 | 63.46 |
| map00400 Phe, Tyr and Trp biosynthesis               | 31                | 28                 | 90.32 |
| map00401 Novobiocin biosynthesis                     | 6                 | 6                  | 100   |
| map00410 beta-Alanine metabolism                     | 32                | 19                 | 59.37 |
| map00430 Taurine and hypotaurine metabolism          | 14                | 7                  | 50    |
| map00440 Aminophosphonate metabolism                 | 8                 | 6                  | 75    |
| map00450 Selenoamino acid metabolism                 | 21                | 18                 | 85.71 |
| map00460 Cyanoamino acid metabolism                  | 18                | 10                 | 55.56 |
| map00471 D-Glutamine - D-glutamate metabolism        | 12                | 6                  | 50    |
| map00472 D-Arginine and D-ornithine metabolism       | 8                 | 2                  | 25    |
| map00473 D-Alanine metabolism                        | 6                 | 4                  | 66.67 |
| map00480 Glutathione metabolism                      | 27                | 13                 | 48.15 |
| map00500 Starch and sucrose metabolism               | 73                | 58                 | 79.45 |
| map00510 N-Glycan biosynthesis                       | 25                | 17                 | 68    |
| map00511 N-Glycan degradation                        | 8                 | 8                  | 100   |
| map00512 O-Glycan biosynthesis                       | 7                 | 3                  | 42.86 |
| map00513 High-mannose N-glycan biosynthesis          | 2                 | 2                  | 100   |
| map00520 Nucleotide sugars metabolism                | 29                | 13                 | 44.83 |
| map00521 Streptomycin biosynthesis                   | 14                | 10                 | 71.43 |
| map00522 Biosynthesis of macrolides                  | 2                 | 1                  | 50    |
| map00523 Polyketide sugar unit biosynthesis          | 5                 | 4                  | 80    |
| map00530 Aminosugars metabolism                      | 36                | 28                 | 77.78 |
| map00531 Glycosaminoglycan degradation               | 11                | 9                  | 81.82 |
| map00532 Chondroitin-heparan sulfate biosynthesis    | 15                | 9                  | 60    |
| map00533 Keratan sulfate biosynthesis                | 5                 | 4                  | 80    |

|                                                   |    |    |       |
|---------------------------------------------------|----|----|-------|
| map00540 Lipopolysaccharide biosynthesis          | 7  | 7  | 100   |
| map00550 Peptidoglycan biosynthesis               | 16 | 14 | 87.5  |
| map00561 Glycerolipid metabolism                  | 75 | 50 | 66.67 |
| map00562 Inositol phosphate metabolism            | 29 | 19 | 65.52 |
| map00580 Phospholipid degradation                 | 12 | 8  | 66.67 |
| map00590 Prostaglandin-leukotriene metabolism     | 18 | 16 | 88.89 |
| map00600 Glycosphingolipid metabolism             | 24 | 19 | 79.17 |
| map00601 Blood glycolipid biosynthesis-lact.      | 8  | 5  | 62.5  |
| map00602 Blood glycolipid biosynthesis-neolact.   | 11 | 7  | 63.64 |
| map00603 Globoside metabolism                     | 10 | 8  | 80    |
| map00604 Ganglioside biosynthesis                 | 6  | 4  | 66.67 |
| map00620 Pyruvate metabolism                      | 65 | 47 | 72.31 |
| map00621 Biphenyl degradation                     | 8  | 4  | 50    |
| map00622 Toluene and xylene degradation           | 17 | 10 | 58.82 |
| map00623 2,4-Dichlorobenzoate degradation         | 22 | 6  | 27.27 |
| map00625 Tetrachloroethene degradation            | 3  | 2  | 66.67 |
| map00626 Nitrobenzene degradation                 | 11 | 5  | 45.45 |
| map00627 1,4-Dichlorobenzene degradation          | 13 | 10 | 76.92 |
| map00628 Fluorene degradation                     | 7  | 5  | 71.43 |
| map00629 Carbazole degradation                    | 9  | 5  | 55.56 |
| map00630 Glyoxylate-dicarboxylate metabolism      | 58 | 37 | 63.79 |
| map00631 1,2-Dichloroethane degradation           | 4  | 4  | 100   |
| map00632 Benzoate degradation via CoA ligation    | 27 | 18 | 66.67 |
| map00640 Propanoate metabolism                    | 43 | 29 | 67.44 |
| map00641 3-Chloroacrylic acid degradation         | 2  | 2  | 100   |
| map00642 Ethylbenzene degradation                 | 3  | 2  | 66.67 |
| map00643 Styrene degradation                      | 15 | 10 | 66.67 |
| map00650 Butanoate metabolism                     | 48 | 33 | 68.75 |
| map00660 C5-Branched dibasic acid metabolism      | 21 | 5  | 23.81 |
| map00670 One carbon pool by folate                | 24 | 20 | 83.33 |
| map00680 Methane metabolism                       | 25 | 20 | 80    |
| map00710 Carbon fixation                          | 23 | 22 | 95.65 |
| map00720 Reductive carboxylate cycle              | 13 | 13 | 100   |
| map00730 Thiamine metabolism                      | 13 | 8  | 61.54 |
| map00740 Riboflavin metabolism                    | 12 | 10 | 83.33 |
| map00750 Vitamin B6 metabolism                    | 20 | 6  | 30    |
| map00760 Nicotinate and nicotinamide metabolism   | 28 | 19 | 67.86 |
| map00770 Pantothenate and CoA biosynthesis        | 26 | 18 | 69.23 |
| map00780 Biotin metabolism                        | 11 | 10 | 90.91 |
| map00790 Folate biosynthesis                      | 24 | 22 | 91.67 |
| map00791 Atrazine degradation                     | 7  | 4  | 57.14 |
| map00830 Retinol metabolism                       | 10 | 1  | 10    |
| map00860 Porphyrin and chlorophyll metabolism     | 57 | 44 | 77.19 |
| map00900 Terpenoid biosynthesis                   | 15 | 9  | 60    |
| map00901 Indole and ipecac alkaloid biosynthesis  | 22 | 2  | 9.09  |
| map00902 Monoterpenoid biosynthesis               | 16 | 1  | 6.25  |
| map00903 Limonene and pinene degradation          | 10 | 3  | 30    |
| map00904 Diterpenoid biosynthesis                 | 18 | 8  | 44.44 |
| map00910 Nitrogen metabolism                      | 55 | 44 | 80    |
| map00920 Sulfur metabolism                        | 29 | 19 | 65.52 |
| map00930 Caprolactam degradation                  | 9  | 4  | 44.44 |
| map00940 Stilbene, coumarine, lignin biosynthesis | 19 | 9  | 47.37 |
| map00941 Flavonoid biosynthesis                   | 20 | 9  | 45    |
| map00950 Alkaloid biosynthesis I                  | 37 | 7  | 18.92 |
| map00960 Alkaloid biosynthesis II                 | 10 | 6  | 60    |
| map00970 Aminoacyl-tRNA biosynthesis              | 21 | 21 | 100   |
| map01051 Biosynthesis of ansamycins               | 1  | 1  | 100   |
| map01053 Biosynthesis of siderophore group        | 4  | 4  | 100   |
| map01055 Biosynthesis of vancomycin antibiotics   | 1  | 1  | 100   |
| map02040 Flagellar assembly                       | 1  | 1  | 100   |
| map03020 RNA polymerase                           | 1  | 1  | 100   |
| map03030 DNA polymerase                           | 1  | 1  | 100   |
| map03050 Proteasome                               | 1  | 1  | 100   |
| map03060 Protein export                           | 2  | 2  | 100   |
| map03070 Type III secretion system                | 1  | 1  | 100   |
| map03090 Type II secretion system                 | 2  | 2  | 100   |
| map04070 Phosphatidylinositol signaling system    | 23 | 18 | 78.26 |
| map04120 Ubiquitin mediated proteolysis           | 1  | 1  | 100   |

N, number of nodes present in each subnetwork and painted by MANET
