# Supplementary figures and images for: MANET: tracing evolution of protein architecture in metabolic networks
Source: Springer Nature journal article supplement (doi:10.1186/1471-2105-7-351), 2006-07-19

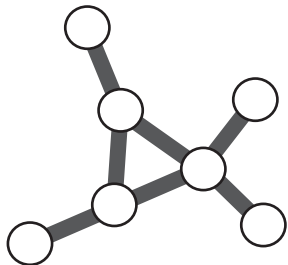

Biomolecular network

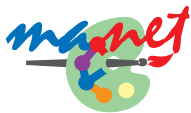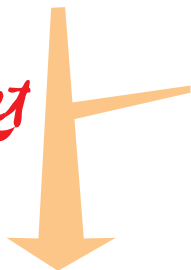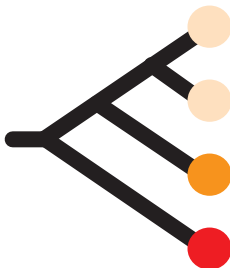

Phylogenomic tree

Ancestry:

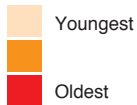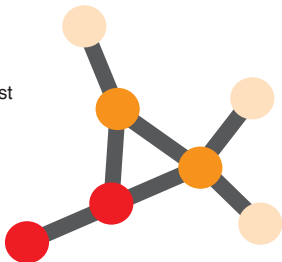

Molecular ancestry network

Supplement: 12859_2006_1090_MOESM2_ESM.pdf [file 12859_2006_1090_MOESM2_ESM.pdf]

A

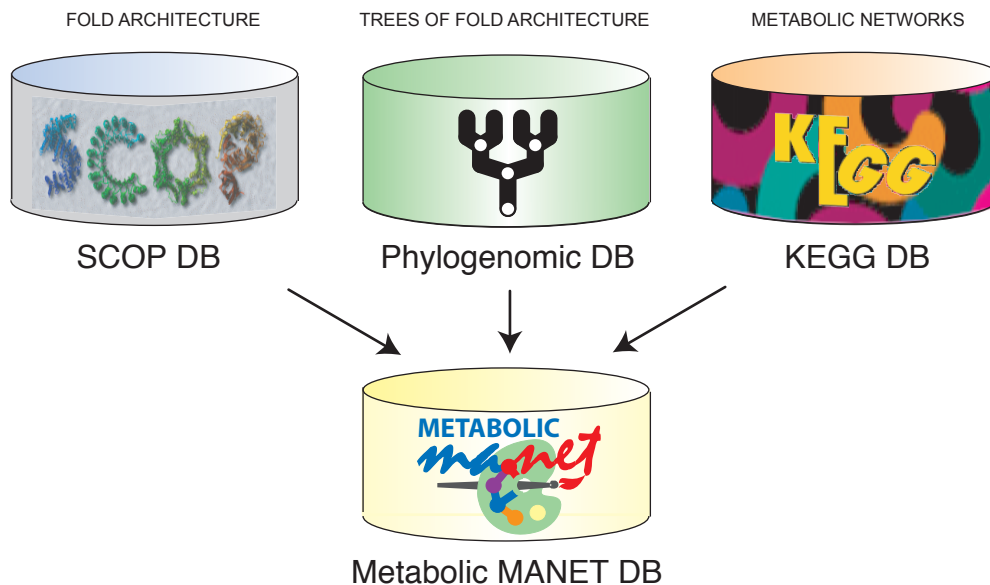

B

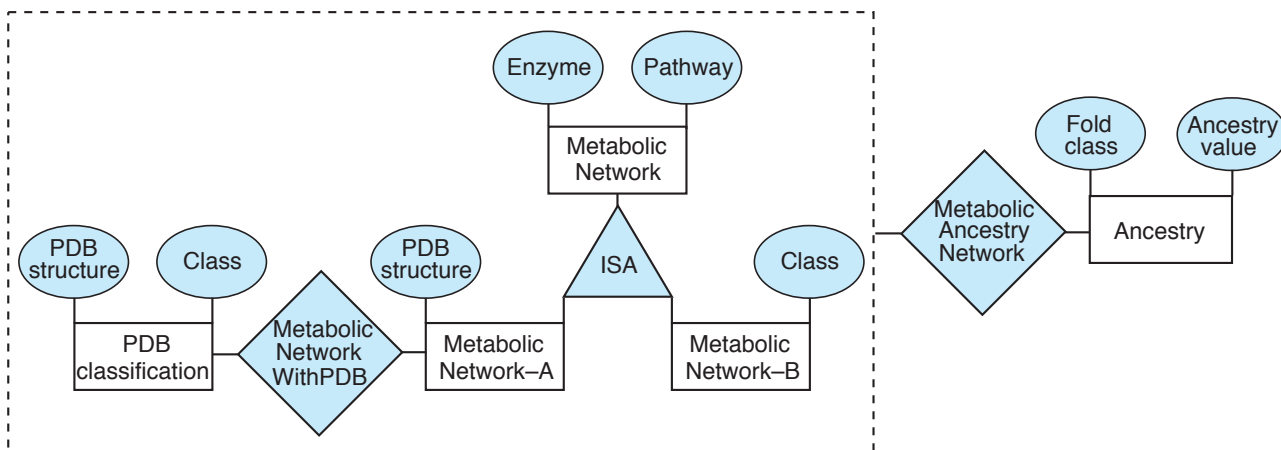

C

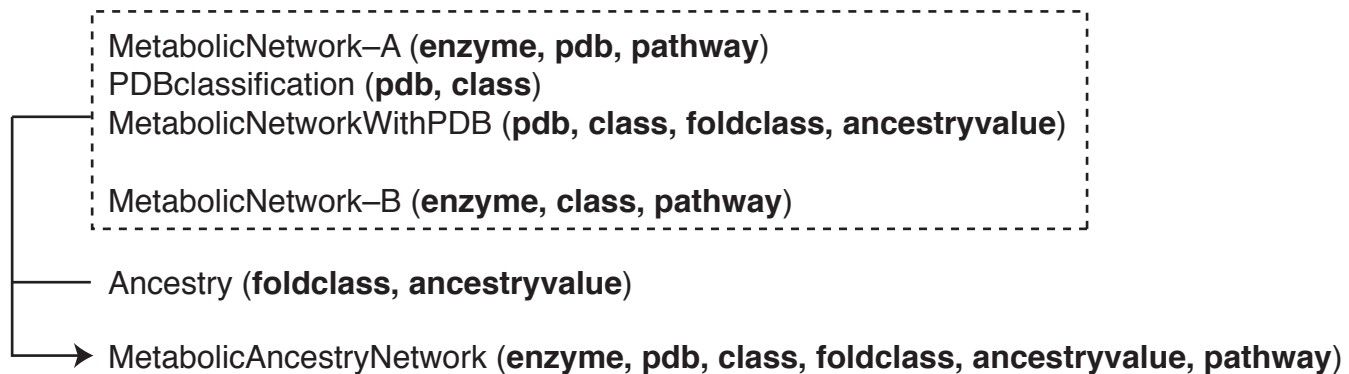

Supplement: 12859_2006_1090_MOESM3_ESM.pdf [file 12859_2006_1090_MOESM3_ESM.pdf]

A

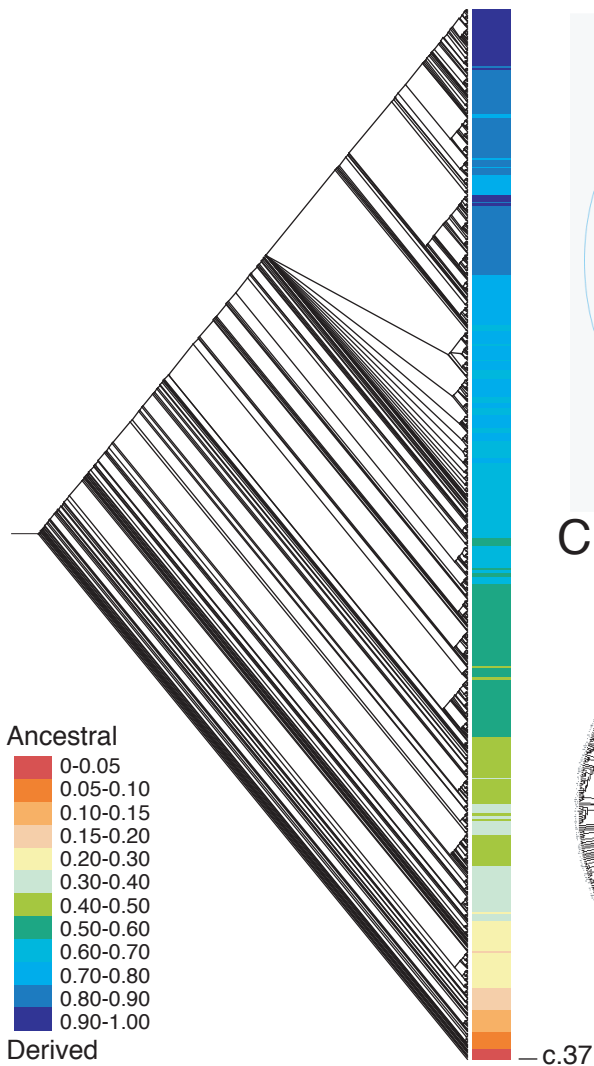

B

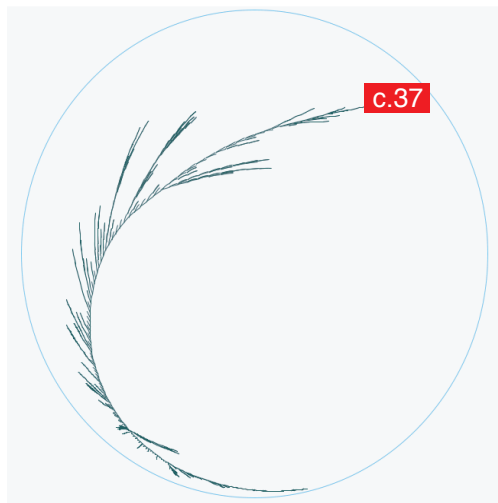

C

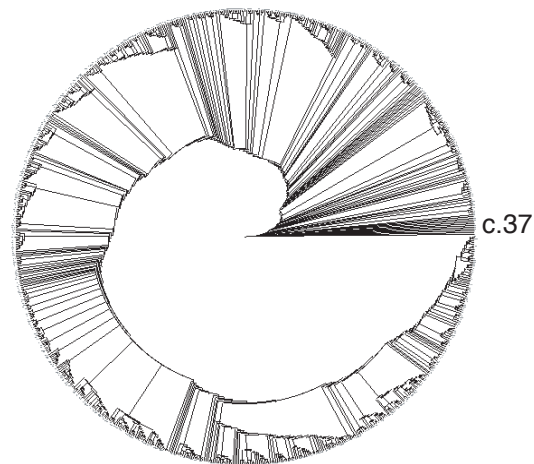

Supplement: 12859_2006_1090_MOESM4_ESM.pdf [file 12859_2006_1090_MOESM4_ESM.pdf]

Number of enzymes/subnetwork

100  
80  
60  
40  
20  
0

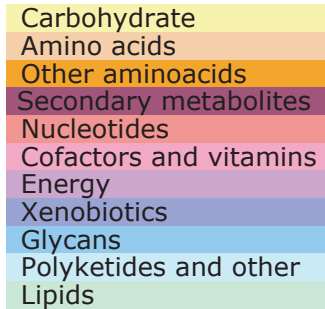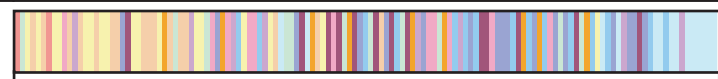

1

Subnetwork

133

Supplement: 12859_2006_1090_MOESM6_ESM.pdf [file 12859_2006_1090_MOESM6_ESM.pdf]

A

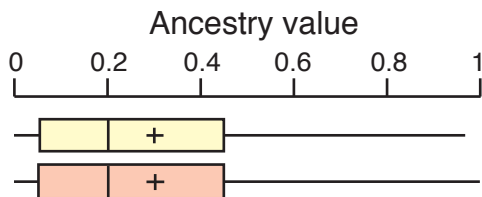

B

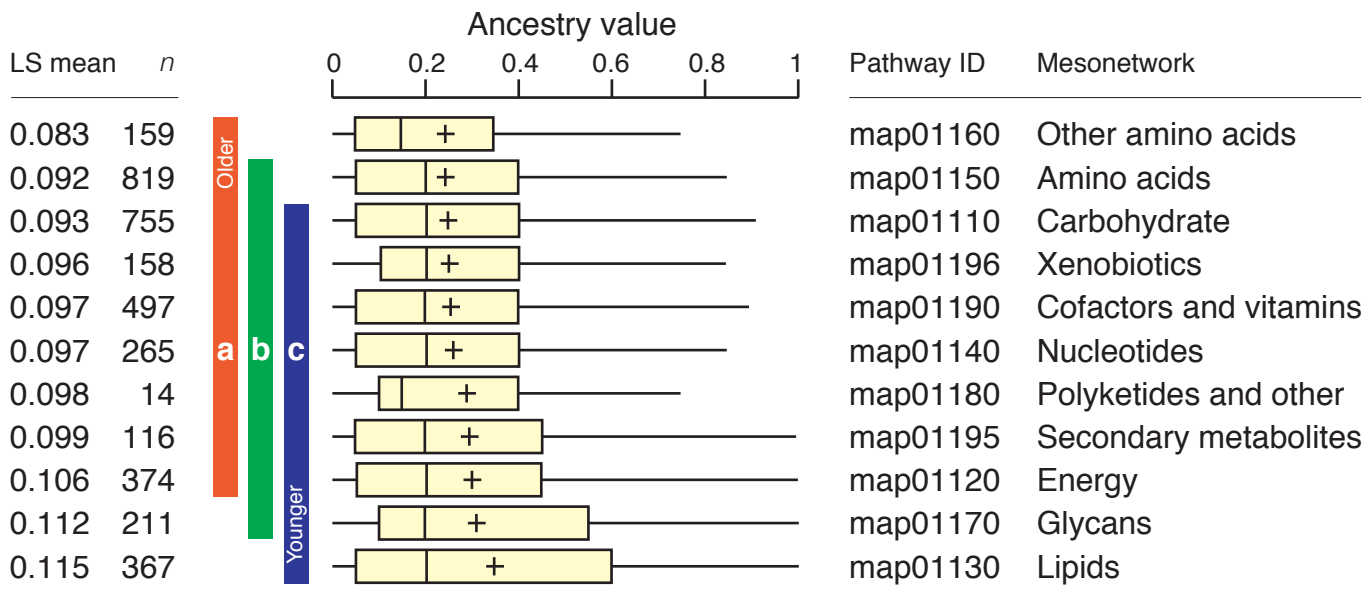

Supplement: 12859_2006_1090_MOESM7_ESM.pdf [file 12859_2006_1090_MOESM7_ESM.pdf]
